# Supplementary material
Source: HighWire-hosted journal article supplement (https://openres.ersjournals.com/content/9/2/00299-2022)

## Supplementary Data 1: Review Protocol

| Field (based on PRISMA-P)                                                 | Content                                                                                                                                                                                                                                                                                                                                                                                                                                                                                                                                                                                                                                                                                                                                                                                                                                                                           |
|---------------------------------------------------------------------------|-----------------------------------------------------------------------------------------------------------------------------------------------------------------------------------------------------------------------------------------------------------------------------------------------------------------------------------------------------------------------------------------------------------------------------------------------------------------------------------------------------------------------------------------------------------------------------------------------------------------------------------------------------------------------------------------------------------------------------------------------------------------------------------------------------------------------------------------------------------------------------------|
| Review question                                                           | What is the clinical and cost effectiveness of chemoradiotherapy or surgery with adjuvant treatment for the treatment for N2 stage NSCLC?                                                                                                                                                                                                                                                                                                                                                                                                                                                                                                                                                                                                                                                                                                                                         |
| Type of review question                                                   | Intervention                                                                                                                                                                                                                                                                                                                                                                                                                                                                                                                                                                                                                                                                                                                                                                                                                                                                      |
| Objective of the review                                                   | To provide clearer guidance regarding the treatment of N2 stage NSCLC. This question was identified during scoping meeting 2. Variation in practice has also been identified.                                                                                                                                                                                                                                                                                                                                                                                                                                                                                                                                                                                                                                                                                                     |
| Eligibility criteria – population/ disease/ condition/ issue/ domain      | People with stage N2 M0 NSCLC.                                                                                                                                                                                                                                                                                                                                                                                                                                                                                                                                                                                                                                                                                                                                                                                                                                                    |
| Eligibility criteria – intervention(s)/exposure(s)/ prognostic factor(s)  | Surgery with/ without chemotherapy                                                                                                                                                                                                                                                                                                                                                                                                                                                                                                                                                                                                                                                                                                                                                                                                                                                |
| Eligibility criteria – comparator(s)/control or reference (gold) standard | 1. Chemoradiotherapy (radiotherapy and chemotherapy) versus 2. Tri-modality treatment                                                                                                                                                                                                                                                                                                                                                                                                                                                                                                                                                                                                                                                                                                                                                                                             |
| Outcomes and prioritisation                                               | <ul style="list-style-type: none"> <li>• Mortality <ul style="list-style-type: none"> <li>○ Cancer-related</li> <li>○ Treatment-related</li> <li>○ All-cause</li> </ul> </li> <li>• Quality of life (as measured by QoL instrument, for example) <ul style="list-style-type: none"> <li>○ ECOG score</li> <li>○ EORTC score</li> <li>○ EQ-5D</li> </ul> </li> <li>• Length of stay <ul style="list-style-type: none"> <li>○ hospital</li> <li>○ ICU</li> </ul> </li> <li>• Exercise tolerance</li> <li>• Adverse events <ul style="list-style-type: none"> <li>○ Oesophagitis, pneumonitis, sepsis (grading)</li> <li>○ Dyspnoea</li> <li>○ Hypoxia and need for home oxygen</li> <li>○ Stroke</li> <li>○ Cardiovascular disease</li> </ul> </li> <li>• Treatment-related dropout rates</li> <li>• Pain (continuous pain scales and/ or proportions of people in pain)</li> </ul> |
| Eligibility criteria – study design                                       | <ul style="list-style-type: none"> <li>• RCT data.</li> <li>• Systematic reviews of RCTs</li> </ul>                                                                                                                                                                                                                                                                                                                                                                                                                                                                                                                                                                                                                                                                                                                                                                               |
| Other inclusion exclusion criteria                                        | <ul style="list-style-type: none"> <li>• Non English-language papers</li> <li>• Unpublished evidence/ conference proceedings</li> </ul>                                                                                                                                                                                                                                                                                                                                                                                                                                                                                                                                                                                                                                                                                                                                           |
| Proposed sensitivity/sub-group analysis, or meta-regression               | No subgroup analysis identified                                                                                                                                                                                                                                                                                                                                                                                                                                                                                                                                                                                                                                                                                                                                                                                                                                                   |

|                                                            |                                                                                                                                                                                                                                                                                                                                                                                                                                                                                                                                                                                                                                          |
|------------------------------------------------------------|------------------------------------------------------------------------------------------------------------------------------------------------------------------------------------------------------------------------------------------------------------------------------------------------------------------------------------------------------------------------------------------------------------------------------------------------------------------------------------------------------------------------------------------------------------------------------------------------------------------------------------------|
| Selection process – duplicate screening/selection/analysis | <p>10% of the abstracts were reviewed by two reviewers, with any disagreements resolved by discussion or, if necessary, a third independent reviewer. If meaningful disagreements were found between the different reviewers, a further 10% of the abstracts were reviewed by two reviewers, with this process continued until agreement is achieved between the two reviewers. From this point, the remaining abstracts will be screened by a single reviewer.</p> <p>This review made use of the priority screening functionality with the EPPI-reviewer systematic reviewing software. See Appendix B for more details.</p>           |
| Data management (software)                                 | See appendix B.                                                                                                                                                                                                                                                                                                                                                                                                                                                                                                                                                                                                                          |
| Information sources – databases and dates                  | <p>No date limit.</p> <p>See appendix C.</p> <p>Main Searches:</p> <ul style="list-style-type: none"> <li>• Cochrane Database of Systematic Reviews – CDSR</li> <li>• Cochrane Central Register of Controlled Trials – CENTRAL</li> <li>• Database of Abstracts of Reviews of Effects – DARE</li> <li>• Health Technology Assessment Database – HTA</li> <li>• EMBASE (Ovid)</li> <li>• MEDLINE (Ovid)</li> <li>• MEDLINE In-Process (Ovid)</li> </ul> <p>Citation searching will be carried out in addition on analyst/committee selected papers.</p> <p>The search will not be date limited because this is a new review question.</p> |
| Identify if an update                                      | <p>Update.</p> <p>Original Question (linked): What is the most effective treatment for patients with resectable non-small cell lung cancer?</p> <p><b>Recommendations that may be affected:</b></p> <p>1.4.27 Patients with stage I or II NSCLC who are medically inoperable but suitable for radical radiotherapy should be offered the CHART regimen. <b>[2005]</b></p>                                                                                                                                                                                                                                                                |
| Author contacts                                            | Guideline update                                                                                                                                                                                                                                                                                                                                                                                                                                                                                                                                                                                                                         |
| Highlight if amendment to previous protocol                | <a href="#">For details please see section 4.5 of Developing NICE guidelines: the manual</a>                                                                                                                                                                                                                                                                                                                                                                                                                                                                                                                                             |
| Search strategy – for one database                         | For details please see appendix C                                                                                                                                                                                                                                                                                                                                                                                                                                                                                                                                                                                                        |
| Data collection process – forms/ duplicate                 | A standardised evidence table format will be used, and published as appendix G (clinical evidence tables) or H (economic evidence tables) of the full guideline.                                                                                                                                                                                                                                                                                                                                                                                                                                                                         |
| Data items – define all variables to be collected          | For details please see evidence tables in appendix G (clinical evidence tables) or H (economic evidence tables) of the full guideline.                                                                                                                                                                                                                                                                                                                                                                                                                                                                                                   |

|                                                                        |                                                                                                                                                                                                                                                                                                                                                                                                                                                                                                                                                                                            |
|------------------------------------------------------------------------|--------------------------------------------------------------------------------------------------------------------------------------------------------------------------------------------------------------------------------------------------------------------------------------------------------------------------------------------------------------------------------------------------------------------------------------------------------------------------------------------------------------------------------------------------------------------------------------------|
|                                                                        |                                                                                                                                                                                                                                                                                                                                                                                                                                                                                                                                                                                            |
| Methods for assessing bias at outcome/study level                      | <p><a href="#">Standard study checklists were used to critically appraise individual studies. For details please see section 6.2 of Developing NICE guidelines: the manual</a></p> <p><a href="#">The risk of bias across all available evidence was evaluated for each outcome using an adaptation of the 'Grading of Recommendations Assessment, Development and Evaluation (GRADE) toolbox' developed by the international GRADE working group</a><br/> <a href="http://www.gradeworkinggroup.org/">http://www.gradeworkinggroup.org/</a></p> <p>For further detail see Appendix B.</p> |
| Criteria for quantitative synthesis (where suitable)                   | <a href="#">For details please see section 6.4 of Developing NICE guidelines: the manual</a>                                                                                                                                                                                                                                                                                                                                                                                                                                                                                               |
| Methods for analysis – combining studies and exploring (in)consistency | <p>For details please see the methods chapter of the full guideline.</p> <p>See appendix B.</p>                                                                                                                                                                                                                                                                                                                                                                                                                                                                                            |
| Meta-bias assessment – publication bias, selective reporting bias      | <p><a href="#">For details please see section 6.2 of Developing NICE guidelines: the manual.</a></p> <p>See appendix B.</p>                                                                                                                                                                                                                                                                                                                                                                                                                                                                |
| Assessment of confidence in cumulative evidence                        | <p><a href="#">For details please see sections 6.4 and 9.1 of Developing NICE guidelines: the manual</a></p> <p>See appendix B.</p>                                                                                                                                                                                                                                                                                                                                                                                                                                                        |
| Rationale/ context – Current management                                | For details please see the introduction to the evidence review in the full guideline.                                                                                                                                                                                                                                                                                                                                                                                                                                                                                                      |
| Describe contributions of authors and guarantor                        | <p><a href="#">A multidisciplinary committee developed the guideline. The committee was convened by NICE Guideline Updates Team and chaired by Gary McVeigh in line with section 3 of Developing NICE guidelines: the manual.</a></p> <p>Staff from NICE Guideline Updates Team undertook systematic literature searches, appraised the evidence, conducted meta-analysis and cost-effectiveness analysis where appropriate, and drafted the guideline in collaboration with the committee. For details please see the methods chapter of the full guideline.</p>                          |
| Sources of funding/support                                             | The NICE Guideline Updates Team is an internal team within NICE.                                                                                                                                                                                                                                                                                                                                                                                                                                                                                                                           |
| Name of sponsor                                                        | The NICE Guideline Updates Team is an internal team within NICE.                                                                                                                                                                                                                                                                                                                                                                                                                                                                                                                           |
| Roles of sponsor                                                       | The NICE Guideline Updates Team is an internal team within NICE.                                                                                                                                                                                                                                                                                                                                                                                                                                                                                                                           |
| PROSPERO registration number                                           | N/A                                                                                                                                                                                                                                                                                                                                                                                                                                                                                                                                                                                        |

**Supplementary Data 2:** Economic model and scenario analyses results (ICERs) exploring plausible variations in the model's input parameters

| Scenario                               | CRS vs CR | CS vs CR  | CRS vs CS | Notes                                                                                     |
|----------------------------------------|-----------|-----------|-----------|-------------------------------------------------------------------------------------------|
| Base Case (5y, FE, disc)               | £19,829   | £74,925   | £4,151    |                                                                                           |
| Base Case PSA                          | £19,017   | £77,698   | £3,973    | Based on the mean of 5,000 iterations                                                     |
| 5Y Random Effects                      | £20,082   | £158,757  | £4,064    | Random rather than fixed effects NMAs used for first 5 years                              |
| No adverse events                      | £21,268   | £68,004   | £7,968    | Adverse events = 0 for all treatments                                                     |
| Adverse events from NMA                | £19,009   | £72,704   | £3,729    | Based on NMA (see appendix J) rather than pairwise data                                   |
| No treatment disutility                | £18,877   | £60,509   | £4,163    | Surgical patients suffer no post-surgery utility decrement                                |
| No long term utility decrement         | £19,689   | £72,305   | £4,156    | Standard age related utility decrements not applied                                       |
| Exponential survival curve             | £20,129   | £81,291   | £4,142    | Survival in patients alive at 5 years modelled using an Exponential curve                 |
| Long term PFS costs = 100%             | £21,787   | £84,893   | £3,829    | Costs for patients surviving 5 years progression free = those within the first 5 years    |
| Long term PFS costs = 50%              | £20,563   | £78,663   | £4,030    | Costs for patients surviving 5 years progression free half those within the first 5 years |
| % undergoing surgery MA = all trials   | £22,148   | £80,950   | £5,521    | % patients dropping out of surgery after chemotherapy derived from all trials in NMA      |
| % undergoing surgery = 100%            | £26,417   | £100,174  | £6,088    | % patients dropping out of surgery after chemotherapy = 0%                                |
| Discount rate = 0%                     | £16,093   | £33,397   | £4,250    | No economic discounting                                                                   |
| 4y Fixed Effects NMA                   | £20,205   | £128,347  | £6,185    | NMAs are from 4 year outcomes rather than 5 year. Survival continues from 4 years         |
| Progs that are deaths set equal        | £21,178   | £78,732   | £4,800    | % of progressions that are in fact deaths set equal among treatments                      |
| PFS Utility = 0.72                     | £21,214   | £80,927   | £4,429    | Progression free utility set to lowest value from literature review                       |
| PFS Utility = 0.83                     | £18,770   | £70,411   | £3,937    | Progression free utility set to highest value from literature review                      |
| Max util, Max decr between PFS and PPS | £19,595   | £74,711   | £4,091    | PFS utility and utility decrement from progression set to highest available values        |
| Min util, Min decr between PFS and PPS | £20,250   | £75,906   | £4,248    | PFS utility and utility decrement from progression set to lowest available values         |
| OR of survival set equal               | £41,105   | dominated | £3,805    | OR of survival = 1 for CS and CRS vs CR                                                   |

|                                 |         |           |         |                                                    |
|---------------------------------|---------|-----------|---------|----------------------------------------------------|
| Cost of Surgery = CC 6+         | £30,062 | £123,274  | £3,537  | Assume cost of surgery = to most complex in class  |
| Cost of Surgery = CC 0-2        | £15,433 | £54,155   | £4,414  | Assume cost of surgery = to least complex in class |
| Cost of Progressed State Halved | £27,201 | £85,067   | £10,734 | Monthly cost of the post progression state halved  |
| Eberhardt baseline for NMAs     | £12,281 | dominated | £716    | Baseline population CR data from Eberhardt 2015    |

Supplementary Figure: diagram of economic model

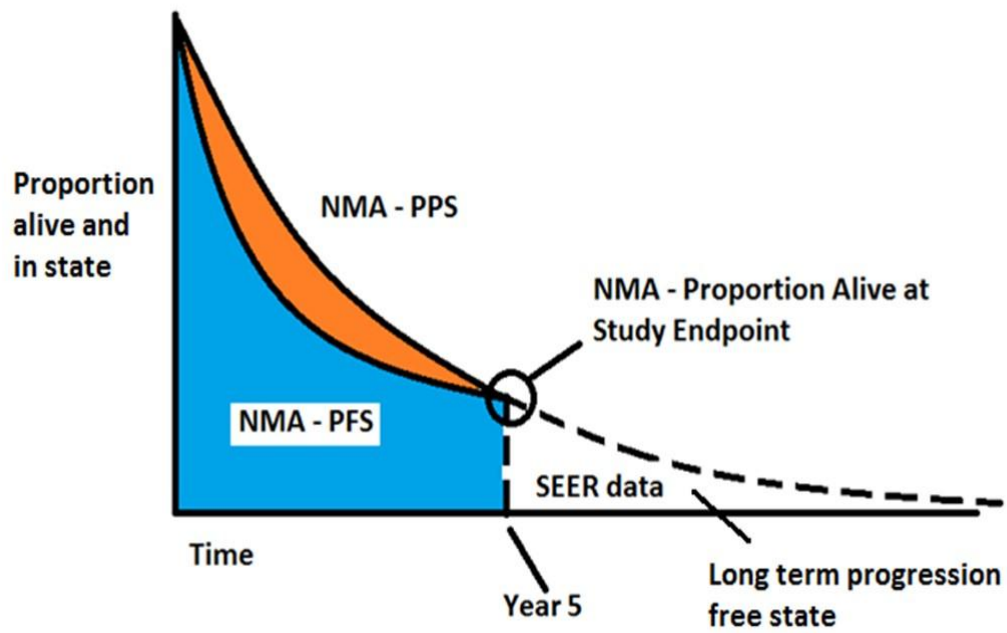

Supplement: inline-supplementary-material-1 [file inline-supplementary-material-1.pdf]
